# Supplementary material for: Stochastic assembly in a subtropical forest chronosequence: evidence from contrasting changes of species, phylogenetic and functional dissimilarity over succession
Source: PubMed Central journal article supplement (PMC5013490; doi:10.1038/srep32596), 2016-09-07
Supplement: srep32596-s1.pdf [file srep32596-s1.pdf]

1 **Stochastic assembly in a subtropical forest chronosequence: evidence from contrasting changes**  
2 **of species, phylogenetic and functional dissimilarity over succession**

3 Xiangcheng Mi, Nathan G. Swenson, Qi Jia, Mide Rao, Gang Feng, Haibao Ren, Daniel P. Bebber,  
4 Keping Ma

5

6 **Appendix A. Study area and basic description of the plots**

7 **Figure A1**

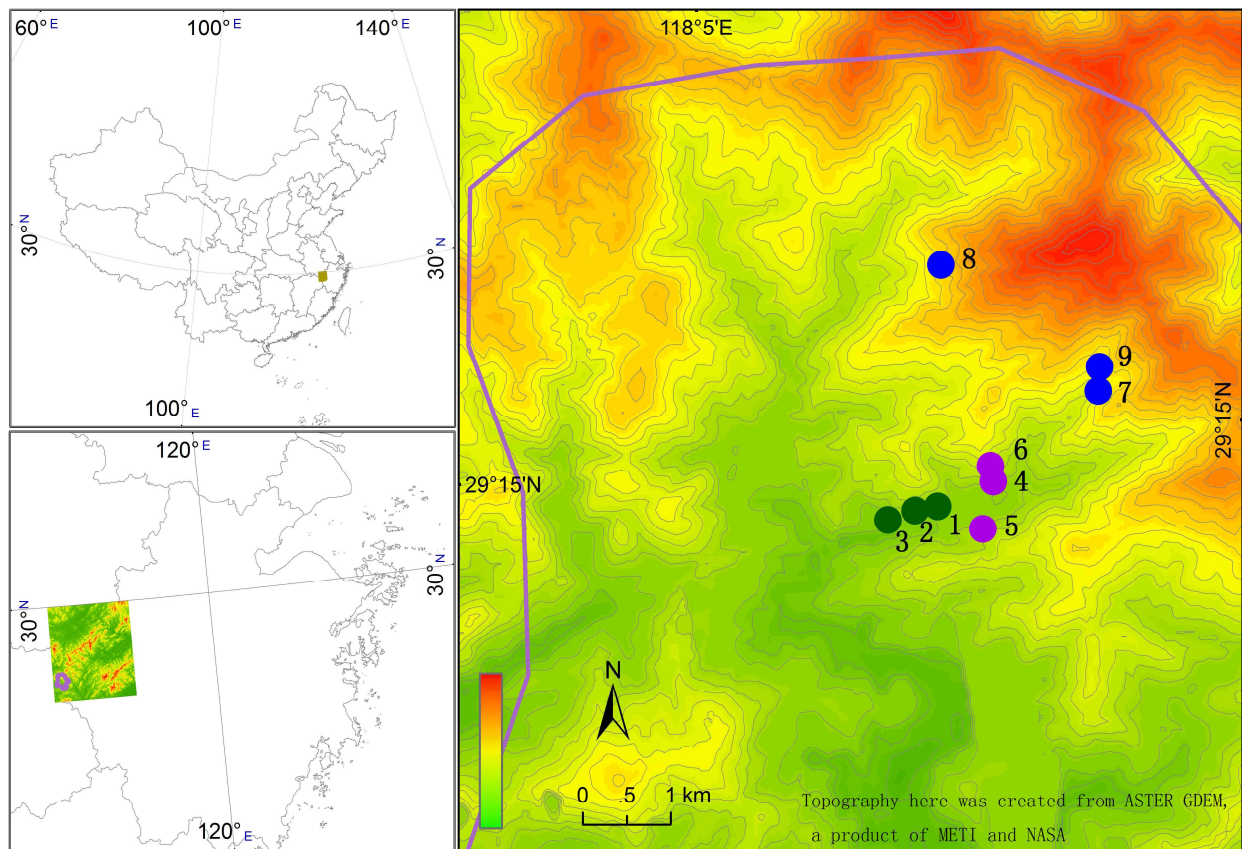

8

9 Figure A1. Locations of study area and Gutianshan National Nature Reserve (NNR). a) Zhejiang

10 Province with Gutianshan NNR in China; b) Gutianshan NNR in Zhejiang Province; c) Gutianshan

11 NNR with nine 1-ha plots. The purple lines in b and c are the boundary of Gutianshan NNR. Twice-cut

12 forest: plots 1-3 have been naturally restored forests after clear-cutting 50 years ago and selective

13 cutting for forest tending 20 years ago. Once-cut forest: plots 4-6 have been naturally restored forests  
14 after clear-cutting 50 years ago. Old growth forest: plots 7-9 are old-growth forests without human  
15 disturbance more than 100 years (figure created from ASTER global digital elevation model owned by  
16 METI and NASA: <http://www.jspacesystems.or.jp/ersdac/GDEM/E/4.html> and authors' data with  
17 ArcGIS 10.0 (ESRI): [www.esri.com/software/arcgis/](http://www.esri.com/software/arcgis/)).

18 Fig. A2

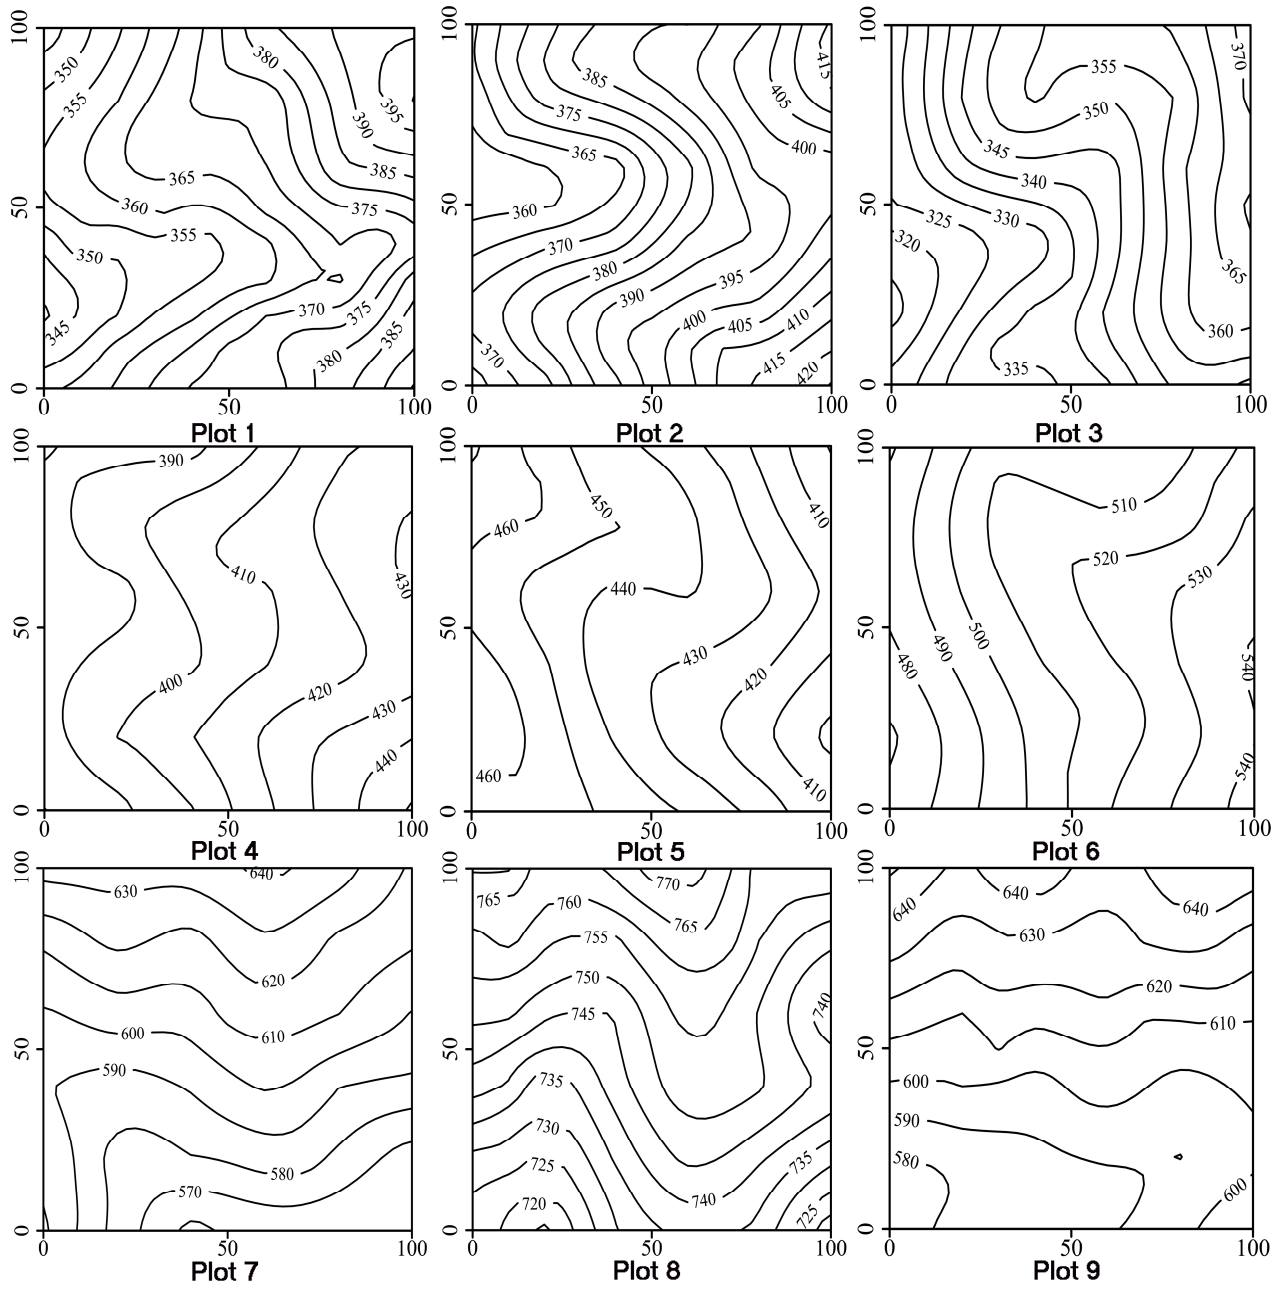

19

20 Figure A2. Topography map of 9 1-ha plots along a disturbance gradient in Gutianshan Nature Reserve.

21 1) twice-cut forest: plots 1-3; 2) once-cut forest: plots 4-6; 3) old growth forest: plots 7-9.

22

23 Fig. A3

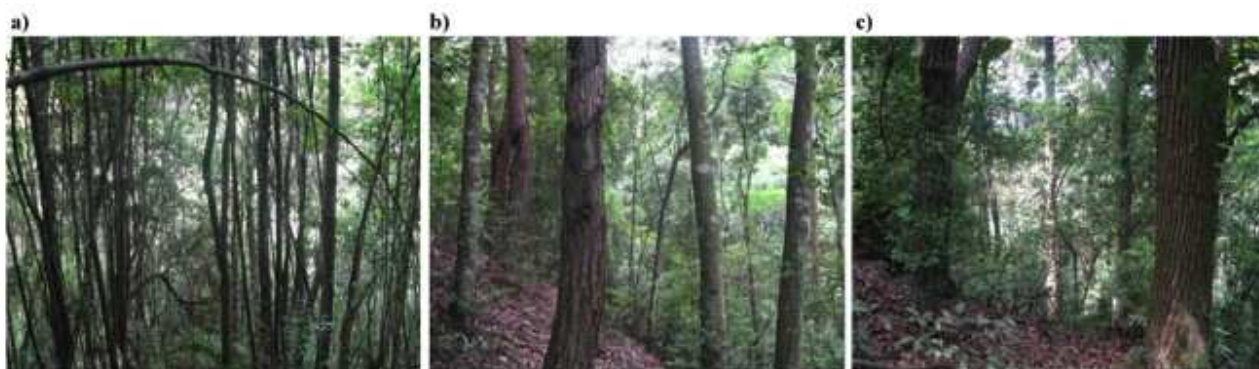

24

25 Fig. A3. Photos of forest types in this study. Each photo was used to illustrate the forest physiognomy  
26 and structure difference among a) twice-cut forest, b) once-cut forest, c) old growth forest.

27 Photo Credit: Xiangcheng Mi

28

29 Table A1. The description of diversity, elevation range, maximum elevation difference in each plot and  
 30 density of 9 1-ha forest plots

| <b>Plot</b> | <b>Successional stage</b> | <b>Elevation range (m)</b> | <b>Maximum elevation difference (m)</b> | <b>Species richness</b> | <b>Tree density (individuals/ha)</b> |
|-------------|---------------------------|----------------------------|-----------------------------------------|-------------------------|--------------------------------------|
| <b>1</b>    |                           | 338.9-                     |                                         |                         |                                      |
|             | I                         | 400.3                      | 61.4                                    | 100                     | 11,611                               |
| <b>2</b>    |                           | 356.1-                     |                                         |                         |                                      |
|             | I                         | 425.5                      | 69.4                                    | 95                      | 10,467                               |
| <b>3</b>    |                           | 312.9 -                    |                                         |                         |                                      |
|             | I                         | 372.6                      | 59.7                                    | 85                      | 8,323                                |
| <b>4</b>    | II                        | 377.5-451.3                | 73.8                                    | 105                     | 5,303                                |
| <b>5</b>    | II                        | 396.7-472.0                | 75.3                                    | 123                     | 5,501                                |
| <b>6</b>    |                           | 468.2-                     |                                         |                         |                                      |
|             | II                        | 544.9                      | 76.7                                    | 87                      | 5,138                                |
| <b>7</b>    | III                       | 556.9-643.0                | 86.1                                    | 114                     | 4,678                                |
| <b>8</b>    | III                       | 713.8-772.9                | 59.1                                    | 89                      | 6,724                                |
| <b>9</b>    | III                       | 575.8-652.1                | 76.3                                    | 118                     | 4,381                                |

31

32

33

34 **Appendix B** Phylogenetic signal analysis of available functional traits

35

36 Table B1 The phylogenetic signal analysis of available functional traits

| <b>Traits</b>                   | <b>K value</b> | <b>P value</b> |
|---------------------------------|----------------|----------------|
| <b>Specific leaf area (SLA)</b> | 0.108          | 0.049          |
| <b>Leaf area</b>                | 0.105          | 0.154          |
| <b>Leaf phosphor content</b>    | 0.160          | 0.004          |
| <b>Leaf nitrogen content</b>    | 0.255          | 0.001          |
| <b>Maximum height</b>           | 0.441          | 0.001          |
| <b>Wood density</b>             | 0.214          | 0.001          |
| <b>Axis 1 of PCA</b>            | 0.270          | 0.007          |
| <b>Axis 2 of PCA</b>            | 0.342          | 0.001          |

37

38

39 **Appendix C** Spatial Correlograms of residuals of linear mixed models

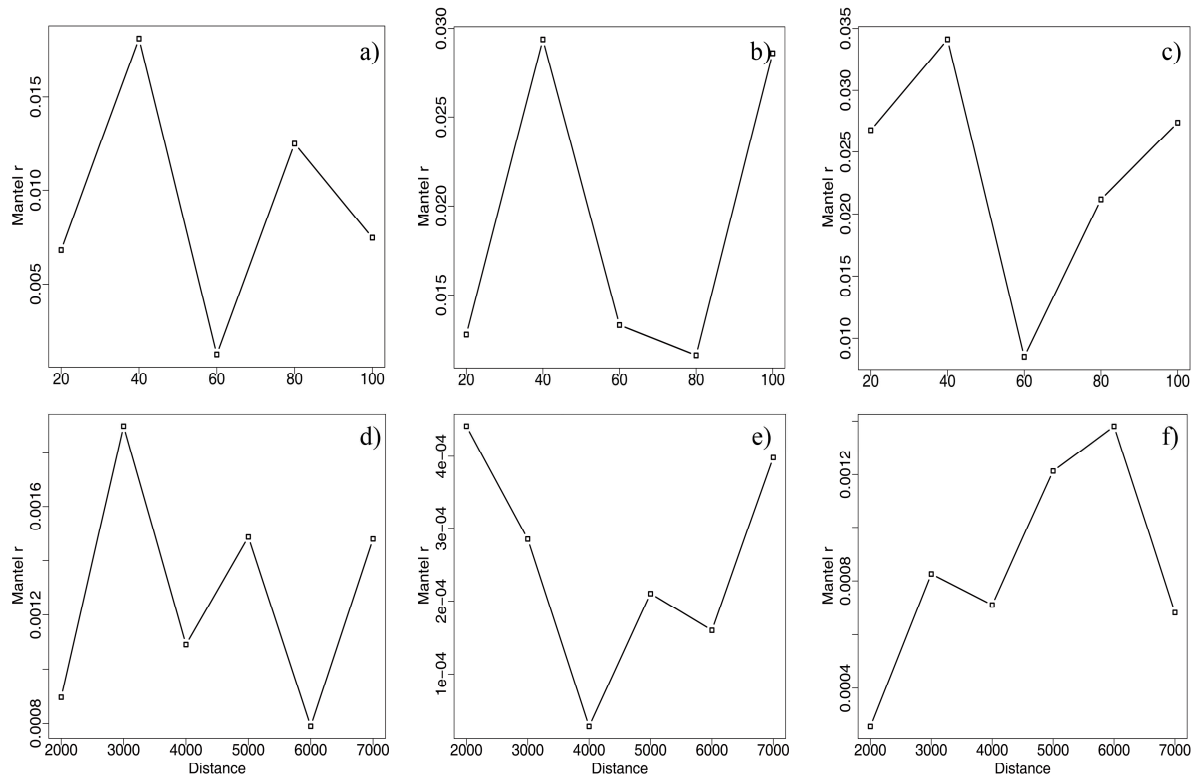

40

41 Figure C1. The spatial correlogram of residuals of linear mixed models for within-plot and  
42 between-plot beta diversity against distance classes at a scale of 20×20 m. a) is spatial  
43 correlogram of residuals of linear mixed model of species beta diversity, b) for phylogenetic beta  
44 diversity, c) for functional beta diversity of all traits at within-plot level, while d) is spatial  
45 correlogram of residuals of linear mixed model of species beta diversity, e) for phylogenetic beta  
46 diversity, f) for functional beta diversity of all traits at between-plot level. All of Mantel r in the  
47 figure is not significant ( $p > 0.05$ ).

48 **Appendix D.** The within-plot and between-plot functional beta diversity of individual traits at  
 49 scales of 10×10 m

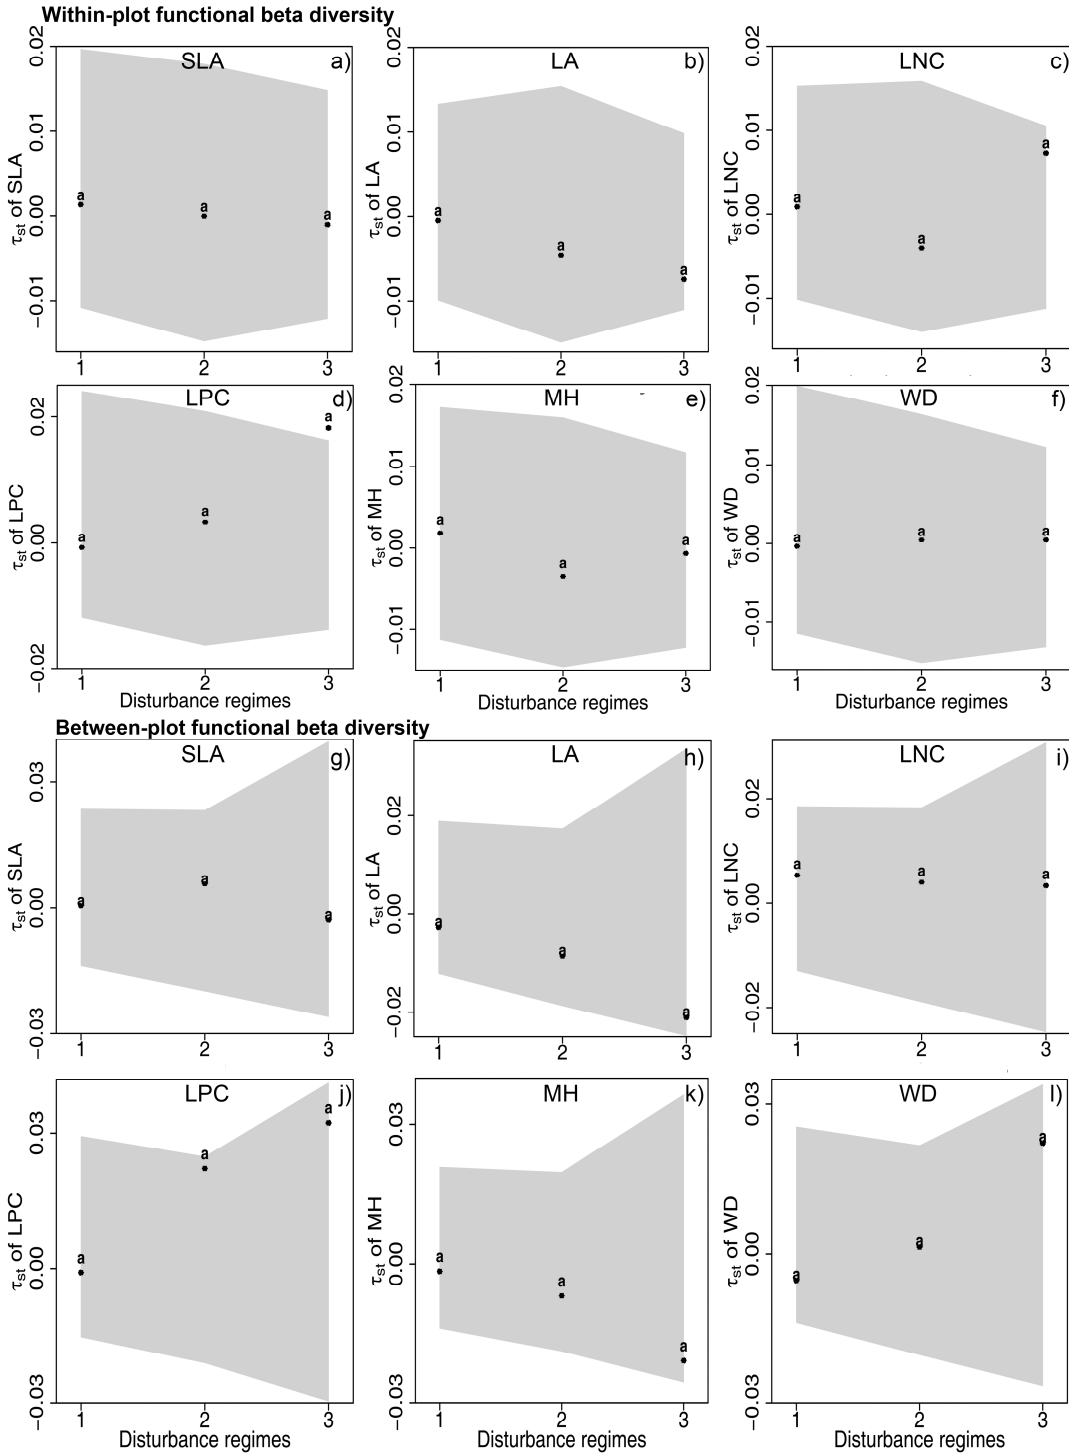

50



51 Figure D1. The within-plot (a-f) and between-plot (g-l) functional beta diversity of individual  
52 traits for all pairs of quadrats (black square, mean  $\pm$  SE) within disturbance regime at a scale of  $10 \times 10$   
53 m. Different letters indicate significant differences ( $P < 0.05$ ) between the effect among disturbance  
54 regimes, and the significance of difference between disturbance regimes was calculated by multiple  
55 comparison. The grey-shaded area represent the 95%-confidence interval for the  $\tau_{st}$  values from the 999  
56 random communities.  $\tau_{st}$  values inside the interval indicate phylogenetic or functional randomness, and  
57  $\tau_{st}$  values outside the interval indicate the significant phylogenetic or functional clustering or dispersion.  
58 SLA = specific leaf area, LA = leaf area, WD = wood density, LPC = leaf phosphorus content, LNC =  
59 leaf nitrogen content, MH = maximum height. Disturbance regimes: 1. twice-cut forest: clear-cutting  
60 50 years ago and selective cutting 20 years ago, 2. once-cut forest: clear-cutting 50 years ago, 3. old  
61 growth forest: without human disturbance more than 100 years.

62

63 **Appendix E** Species, phylogenetic and functional beta diversity of different disturbance regimes at  
 64 within-plot and between-plot levels and at different scales

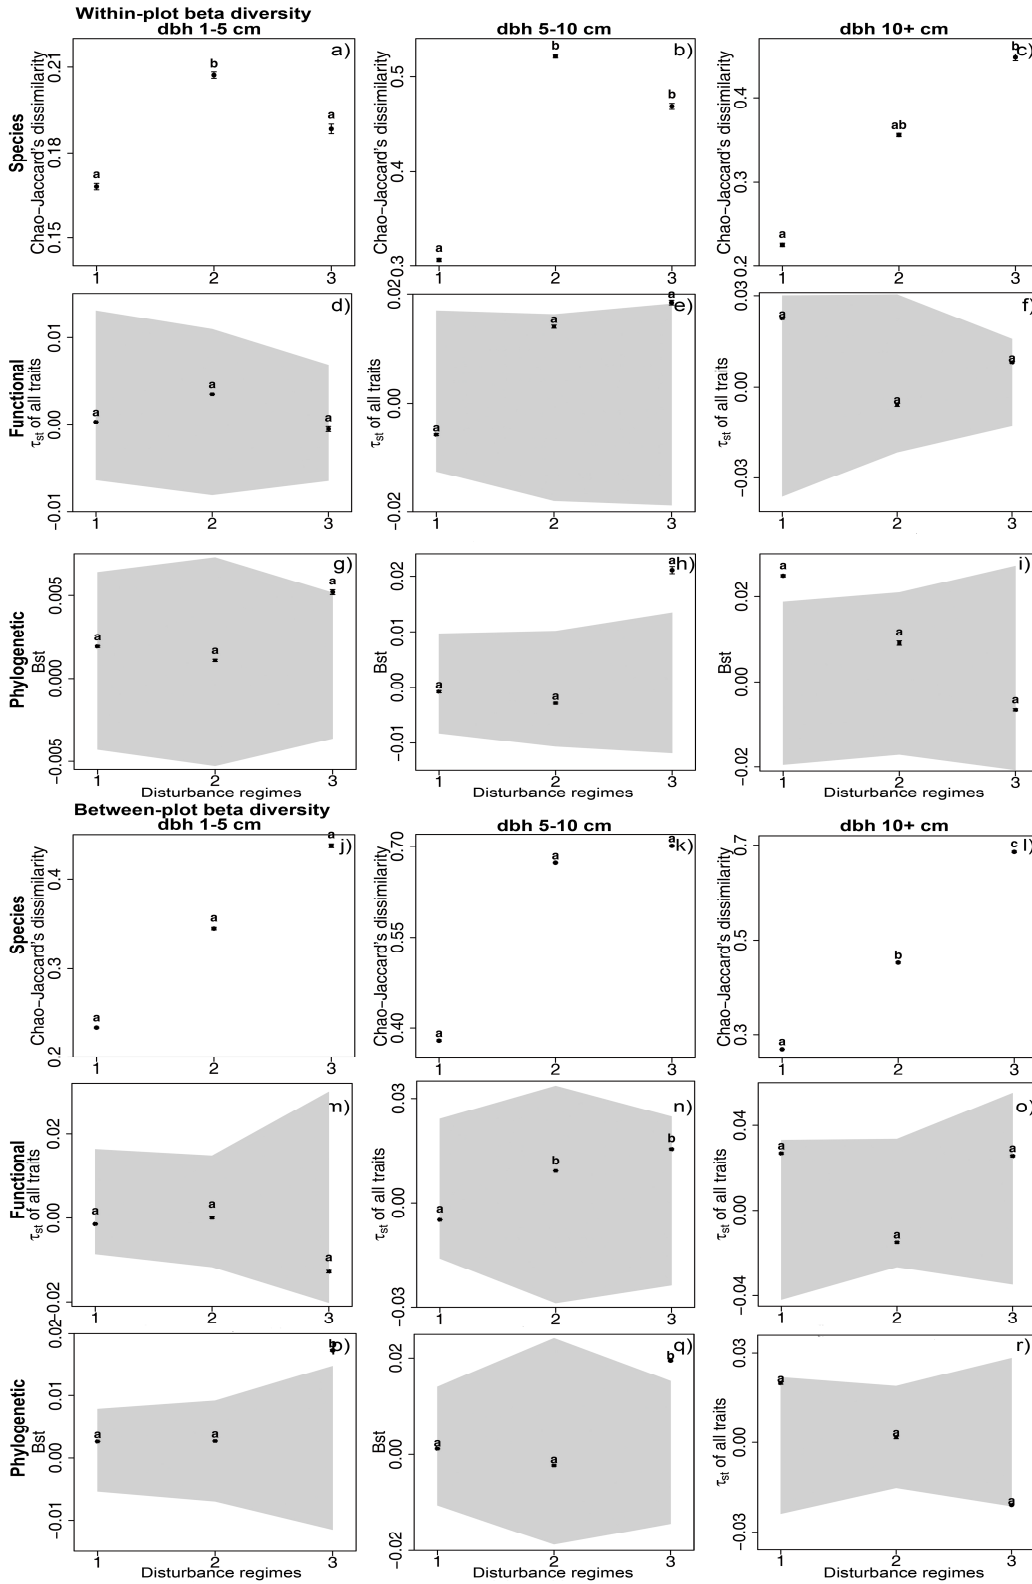

65

66 Fig. E1. Within-plot and between-plot species, phylogenetic and functional beta diversity for all pairs of  
67 quadrats (black square, mean $\pm$ SE) within different disturbance regimes at a scale of 20 $\times$ 20 m. Different  
68 letters indicate significant differences (P<0.05) between disturbance regimes, and the significance of  
69 difference between disturbance regimes was calculated by multiple comparison. The grey-shaded area  
70 represent the 95%-confidence interval for  $\tau_{st}$  and  $B_{st}$  values from the 999 random communities.  $\tau_{st}$  and  
71  $B_{st}$  values inside the interval indicate phylogenetic or functional randomness, and  $\tau_{st}$  and  $B_{st}$  values  
72 outside the interval indicate the significant phylogenetic or functional clustering or dispersion. The  
73 right, middle and left panels showed phylogenetic beta diversity for cohorts with 1-5 cm dbh, 5-10 cm  
74 dbh, and larger than 10 cm. Disturbance regimes: 1. twice-cut forest: clear-cutting 50 years ago and  
75 selective cutting 20 years ago, 2. once-cut forest: clear-cutting 50 years ago, 3. old growth forest:  
76 without human disturbance more than 100 years.

77

78

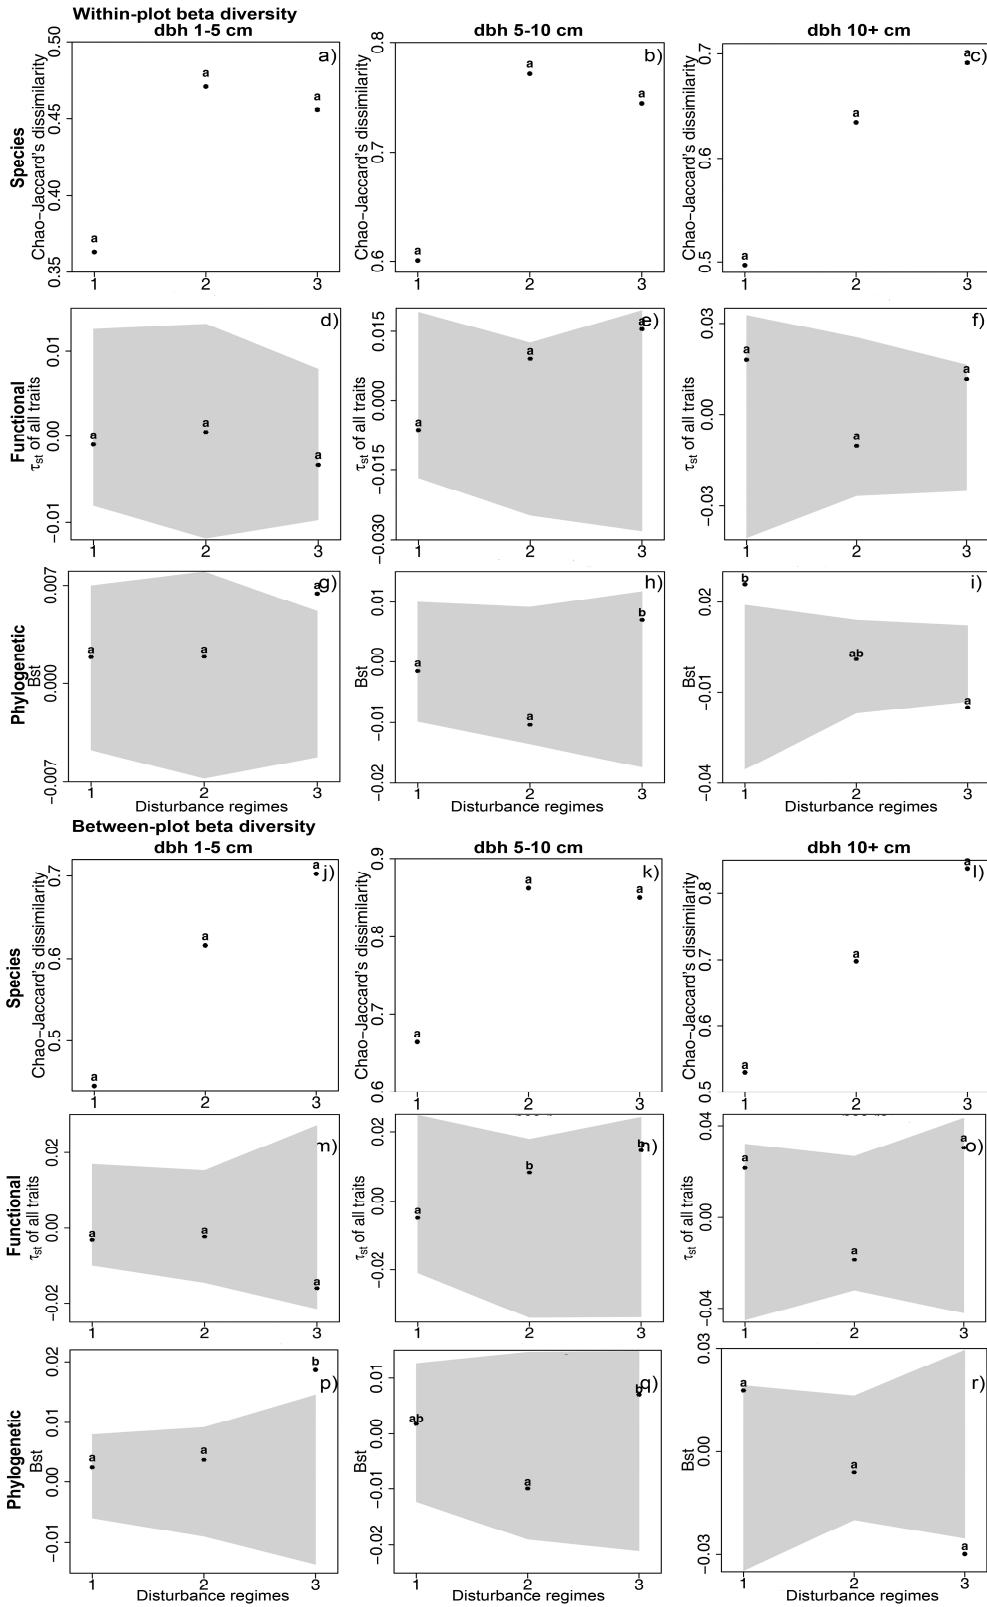

81 Fig. E2 Within-plot (a-i) and between-plot (j-r) species, phylogenetic and functional beta diversity for  
82 all pairs of quadrats (black square, mean±SE) in different disturbance regimes at a scale of 10×10 m.  
83 Different letters indicate significant differences ( $P<0.05$ ) between disturbance regimes, and the  
84 significance of difference between disturbance regimes was calculated by multiple comparison. The  
85 grey-shaded area represent the 95%-confidence interval for the  $\tau_{st}$  and  $B_{st}$  values from the 999 random  
86 communities.  $\tau_{st}$  and  $B_{st}$  values inside the interval indicate phylogenetic or functional randomness, and  
87  $\tau_{st}$  and  $B_{st}$  values outside the interval indicate the significant phylogenetic or functional clustering or  
88 dispersion. The right, middle and left panels showed functional beta diversity for cohorts with 1-5 cm  
89 dbh, 5-10 cm dbh, and larger than 10 cm. Disturbance regimes: 1. twice-cut forest: clear-cutting 50  
90 years ago and selective cutting 20 years ago, 2. once-cut forest: clear-cutting 50 years ago, 3. old  
91 growth forest: without human disturbance more than 100 years.

92

93

94

95 **Appendix F** Effect of disturbance regime and other significant factors on species, phylogenetic and  
 96 functional beta diversity

97 **Table F1. Effect of disturbance regimes and other significant factors on species and phylogenetic**  
 98 **beta diversity at within-plot and between-plot levels and at scale of 20×20m**

| Beta diversity type               |                                    | Statistics                           |                    |        |        |        |
|-----------------------------------|------------------------------------|--------------------------------------|--------------------|--------|--------|--------|
|                                   |                                    | Predicting variables                 | DF1                | DF2    | F      | P      |
| <b>Within-plot beta diversity</b> | Chao-Jaccard<br>dissimilarity      | Disturbance regime                   | 2.0                | 6.5    | 0.79   | 0.491  |
|                                   |                                    | Spatial distance                     | 1.0                | 2686.4 | 142.76 | <.001  |
|                                   |                                    | Disturbance regime×habitat distance  | 3.0                | 2687.8 | 7.13   | <.001  |
|                                   | <i>B<sub>st</sub></i>              | Disturbance regime                   | 2                  | 6.0    | 0.17   | 0.845  |
|                                   |                                    | habitat distance                     | 1                  | 2665.4 | 12.71  | <0.01  |
|                                   | <i>τ<sub>st</sub></i>              | Disturbance regime                   | 2.0                | 6.85   | 0.584  | 0.583  |
|                                   |                                    | Disturbance regime ×habitat distance | 3.0                | 2659.2 | 10.50  | <.001  |
|                                   | <b>Between-plot beta diversity</b> | Chao-Jaccard                         | Disturbance regime | 2      | 6.4    | 6.47   |
| Habitat distance                  |                                    |                                      | 1                  | 5614.1 | 11.00  | 0.001  |
| dissimilarity                     |                                    | Disturbance regime ×habitat distance | 2                  | 5614.0 | 28.78  | <.001  |
|                                   |                                    | Disturbance regime                   | 2                  | 2.2    | 0.092  | 0.915  |
| <i>B<sub>st</sub></i>             |                                    | Habitat distance                     | 1                  | 5566.6 | 33.26  | <.001  |
|                                   |                                    | Spatial distance                     | 1                  | 19.2   | 15.99  | <0.001 |
|                                   |                                    | Disturbance regime ×habitat distance | 2                  | 5562   | 18.02  | <.001  |
| <i>τ<sub>st</sub></i>             |                                    | Disturbance regime                   | 2                  | 6.4    | 0.424  | 0.671  |
|                                   |                                    | Habitat distance                     | 1                  | 5587.4 | 75.96  | <.001  |
|                                   |                                    | Disturbance regime ×habitat distance | 2                  | 5587.3 | 25.08  | <.001  |

99

100

101

102 **Table F2. Effect of disturbance regimes and other significant factors on species and phylogenetic**  
 103 **beta diversity at within-plot and between-plot levels and at scale of 10×10m**

104

| Beta diversity type               |                                    | Statistics                          |                    |       |         |        |       |
|-----------------------------------|------------------------------------|-------------------------------------|--------------------|-------|---------|--------|-------|
|                                   |                                    | Predicting variables                | DF1                | DF2   | F       | P      |       |
| <b>Within-plot beta diversity</b> | Chao-Jaccard dissimilarity         | Disturbance regime                  | 2.0                | 6.0   | 1.22    | 0.359  |       |
|                                   |                                    | Habitat distance                    | 1.0                | 44519 | 663.45  | <.001  |       |
|                                   |                                    | Spatial distance                    | 1.0                | 44516 | 1692.10 | <.001  |       |
|                                   | <i>Bst</i>                         | Disturbance regime×habitat distance | 3.0                | 44519 | 51.96   | <.001  |       |
|                                   |                                    | Disturbance regime                  | 2                  | 6.0   | 0.23    | 0.800  |       |
|                                   |                                    | Habitat distance                    | 1                  | 44291 | 147.85  | <.001  |       |
|                                   | $\tau_{st}$                        | Disturbance regime                  | 2                  | 6.0   | 0.020   | 0.981  |       |
|                                   |                                    | Habitat distance                    | 1.0                | 44380 | 22.15   | <.001  |       |
|                                   |                                    | Disturbance regime×habitat distance | 2                  | 44291 | 16.74   | <.001  |       |
|                                   | <b>Between-plot beta diversity</b> | Chao-Jaccard dissimilarity          | Disturbance regime | 2     | 9.0     | 0.90   | 0.438 |
|                                   |                                    |                                     | Habitat distance   | 1     | 89952   | 738.95 | <.001 |
|                                   |                                    |                                     | Spatial distance   | 1     | 5669    | 178.52 | <.001 |
| <i>Bst</i>                        |                                    | Disturbance regime×habitat distance | 2                  | 89951 | 86.19   | <.001  |       |
|                                   |                                    | Disturbance regime                  | 2                  | 5     | 0.05    | 0.950  |       |
|                                   |                                    | Habitat distance                    | 1                  | 89564 | 262.98  | <.001  |       |
| $\tau_{st}$                       |                                    | Spatial distance                    | 1                  | 701   | 62.61   | <.001  |       |
|                                   |                                    | Disturbance regime×habitat distance | 3                  | 89561 | 46.73   | <.001  |       |
|                                   |                                    | Disturbance regime                  | 2                  | 4     | 0.168   | 0.851  |       |
| $\tau_{st}$                       |                                    | Habitat distance                    | 1                  | 89702 | 154.01  | <.001  |       |
|                                   |                                    | Spatial distance                    | 1                  | 217   | 38.42   | <.001  |       |
|                                   |                                    | Disturbance regime×habitat distance | 2                  | 89702 | 45.33   | <.001  |       |

105

106

107

108

109
